# Supplementary figures and images for: Risk Assessment of Over-the-Counter Cannabinoid-Based Cosmetics: Legal and Regulatory Issues Governing the Safety of Cannabinoid-Based Cosmetics in the UAE
Source: MDPI journal article supplement (doi:10.3390/cosmetics8030057), 2021-06-23

## Supplementary Materials

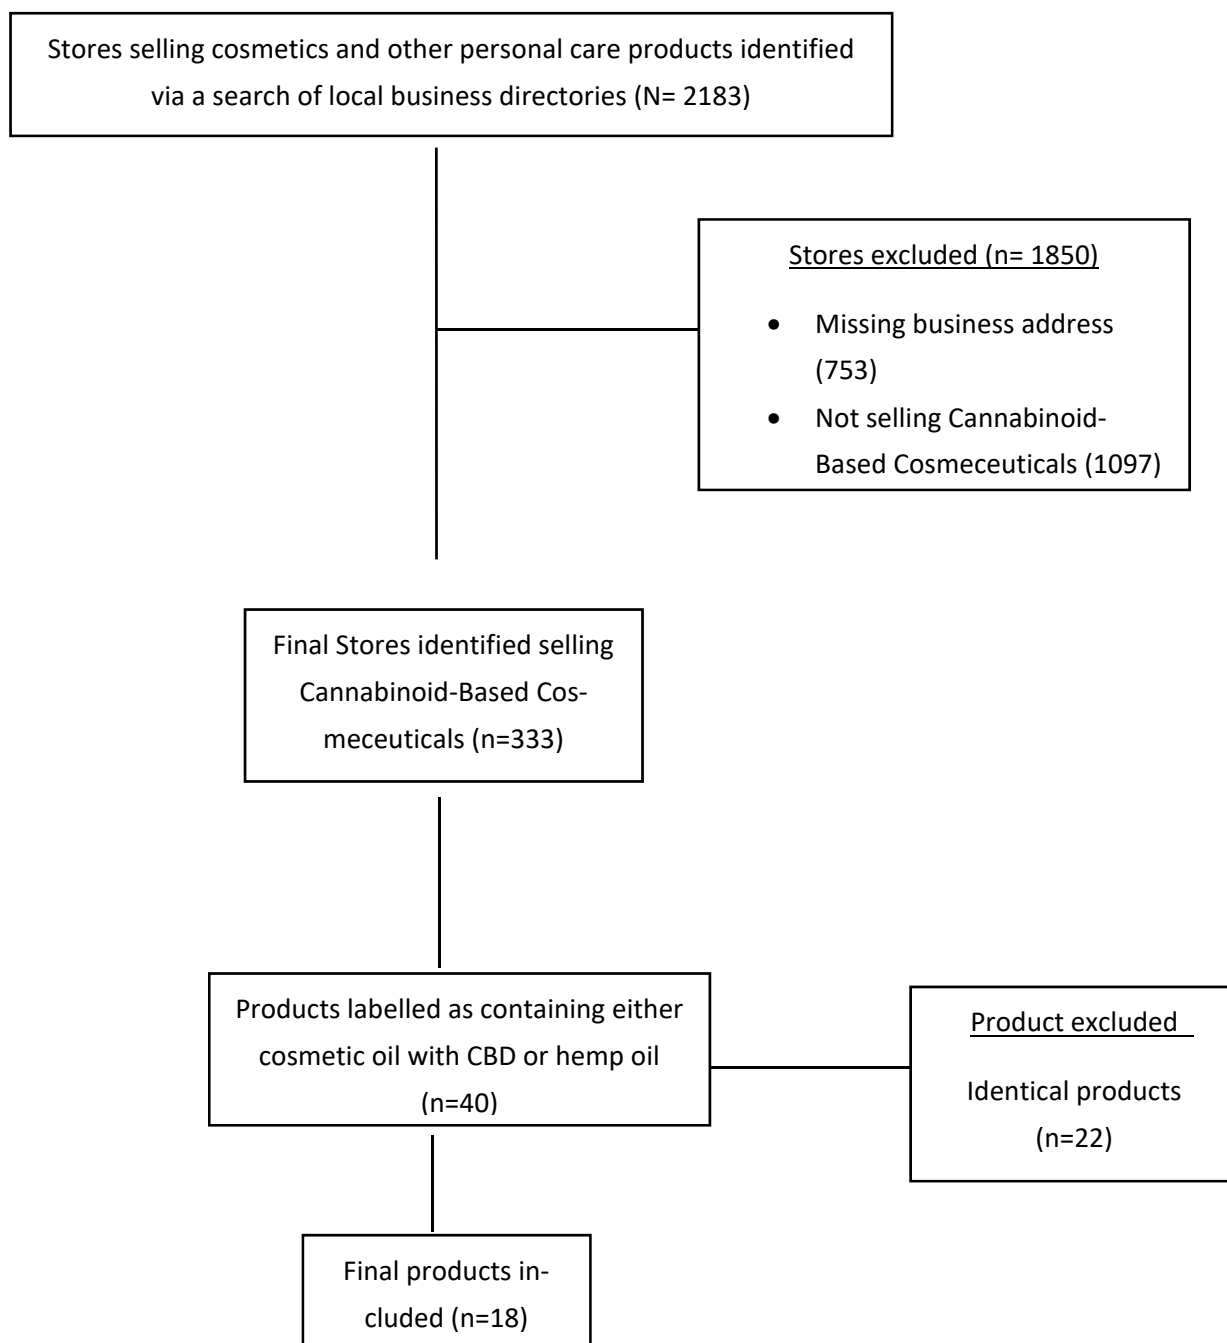

**Figure S1.** Sample Collection.

Supplement: s1 [file s1]
